# Supplementary material
Source: HighWire-hosted journal article supplement (https://bmjopenquality.bmj.com/highwire/filestream/136071/field_highwire_adjunct_files/0/ds6247.docx)
Supplement: ds6247.docx [file ds6247.docx]

**Table 1 Patient recall of neurological examination**

|  | **Pre-intervention** | | | | | | | **Post-intervention** | | | | | | | **TOS % Difference (Post-Pre)** | | |
| --- | --- | --- | --- | --- | --- | --- | --- | --- | --- | --- | --- | --- | --- | --- | --- | --- | --- |
|  | **Total** | **T** | **T%** | **O** | **O%** | **S** | **S%** | **Total** | **T** | **T%** | **O** | **O%** | **S** | **S%** | **T** | **O** | **S** |
| **City (Birmingham)** | 54 | 45 | 83.33 | 29 | 53.70 | 51 | 94.44 | 56 | 48 | 85.71 | 37 | 66.07 | 51 | 91.07 | 2.38 | 12.37 | -3.37 |
| **Sandwell** | 14 | 8 | 57.14 | 5 | 35.71 | 13 | 92.86 | 5 | 3 | 60.00 | 2 | 40.00 | 4 | 80.00 | 2.86 | 4.29 | -12.86 |
| **UHB** | 40 | 24 | 60.00 | 17 | 42.50 | 35 | 87.50 | 64 | 53 | 82.81 | 29 | 45.31 | 53 | 82.81 | 22.81 | 2.81 | -4.69 |
| **Worcester** | 11 | 6 | 54.55 | 6 | 54.55 | 8 | 72.73 | 7 | 7 | 100.00 | 3 | 42.86 | 5 | 71.43 | 45.45 | -11.69 | -1.30 |
| **Salford** | 48 | 37 | 77.08 | 16 | 33.33 | 48 | 100.00 | 19 | 14 | 73.68 | 4 | 21.05 | 18 | 94.74 | -3.40 | -12.28 | -5.26 |
| **NHNN** | 40 | 27 | 67.50 | 10 | 25.00 | 33 | 82.50 | 43 | 38 | 88.37 | 27 | 62.79 | 38 | 88.37 | 20.87 | 37.79 | 5.87 |
| **UCLH** | 44 | 37 | 84.09 | 16 | 36.36 | 15 | 34.09 | 20 | 15 | 75.00 | 9 | 45.00 | 15 | 75.00 | -9.09 | 8.64 | 40.91 |
| **Jordan** | 42 | 13 | 30.95 | 8 | 19.05 | 19 | 45.24 | 53 | 30 | 56.60 | 15 | 28.30 | 36 | 67.92 | 25.65 | 9.25 | 22.69 |
| **Sweden (2 centres)** | 74 | 59 | 79.73 | 12 | 16.22 | 67 | 90.54 | 84 | 78 | 92.86 | 23 | 27.38 | 78 | 92.86 | 13.13 | 11.16 | 2.32 |
| **UAE** | 40 | 8 | 20.00 | 0 | 0.00 | 32 | 80.00 | 40 | 12 | 30.00 | 0 | 0.00 | 32 | 80.00 | 10.00 | 0.00 | 0.00 |
| **Subtotal** | **407** | **264** | **64.86** | **119** | **29.24** | **321** | **78.87** | **391** | **298** | **76.21** | **149** | **38.11** | **330** | **84.40** | **11.35** | **8.87** | **5.53** |
|  |  |  |  |  |  |  |  |  |  |  |  |  |  |  | p<0.001 | p=0.009 | p=0.045 |
| **Wolverhampton** | 12 | 4 | 33.33 | 3 | 25.00 | 8 | 66.67 |  |  |  |  |  |  |  |  |  |  |
| **Milton Keynes** | 43 | 24 | 55.81 | 10 | 23.26 | 32 | 74.42 |  |  |  |  |  |  |  |  |  |  |
| **Romford** | 34 | 16 | 47.06 | 3 | 8.82 | 30 | 88.24 |  |  |  |  |  |  |  |  |  |  |
| **Total** | **496** | **308** | **62.10** | **135** | **27.22** | **391** | **78.83** |  |  |  |  |  |  |  |  |  |  |

UHB = University Hospital Birmingham, NHNN = National Hospital of Neurology and Neurosurgery, UCLH = University College London Hospital, UAE = United Arab Emirates

Patient recall use of T=Tendon hammer; O=Ophthalmoscope; S=Stethoscope (% figures indicate the proportion of patients who did recall being examined)
